# Supplementary material for: Astaxanthin Restrains Nitrative-Oxidative Peroxidation in Mitochondrial-Mimetic Liposomes: A Pre-Apoptosis Model
Source: PubMed Central journal article supplement (PMC5923413; doi:10.3390/md16040126), 2018-04-12
Supplement: marinedrugs-16-00126-s001.pdf [file marinedrugs-16-00126-s001.pdf]

Supplementary Material Figure S1

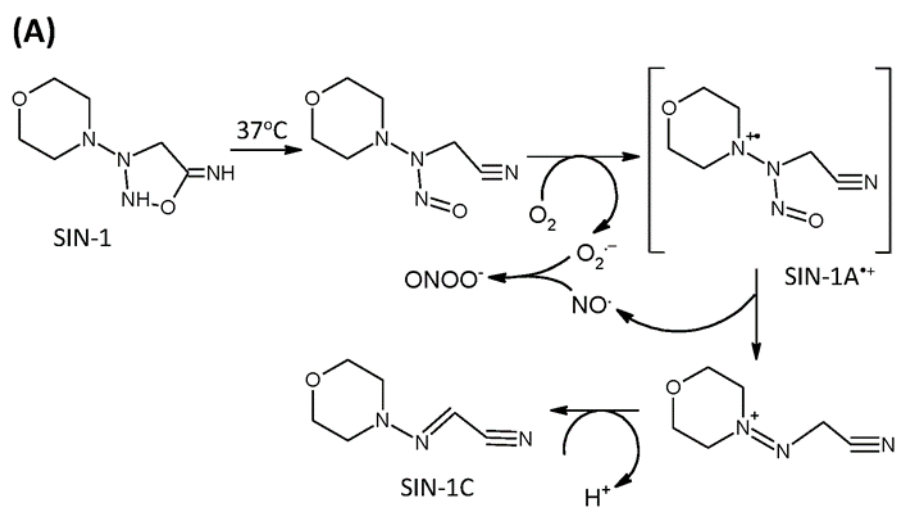

**(B)**

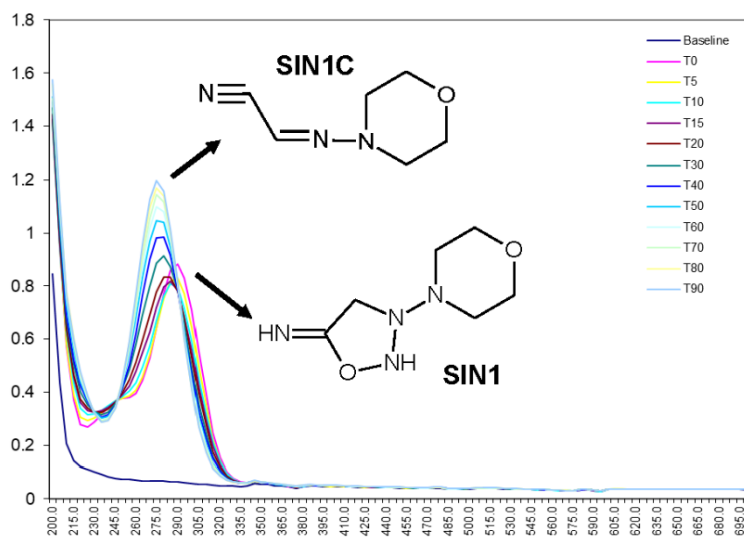

Supplementary Material Figure S2

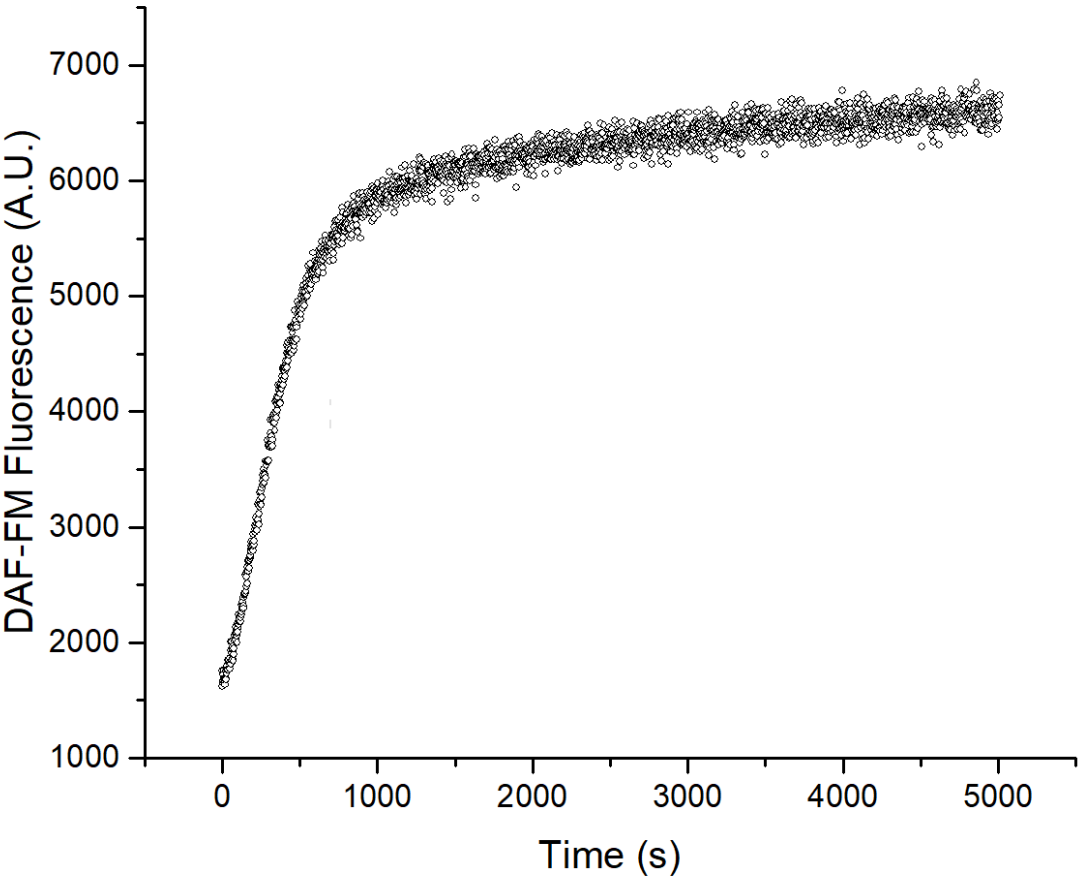

Supplementary Material Figure S3

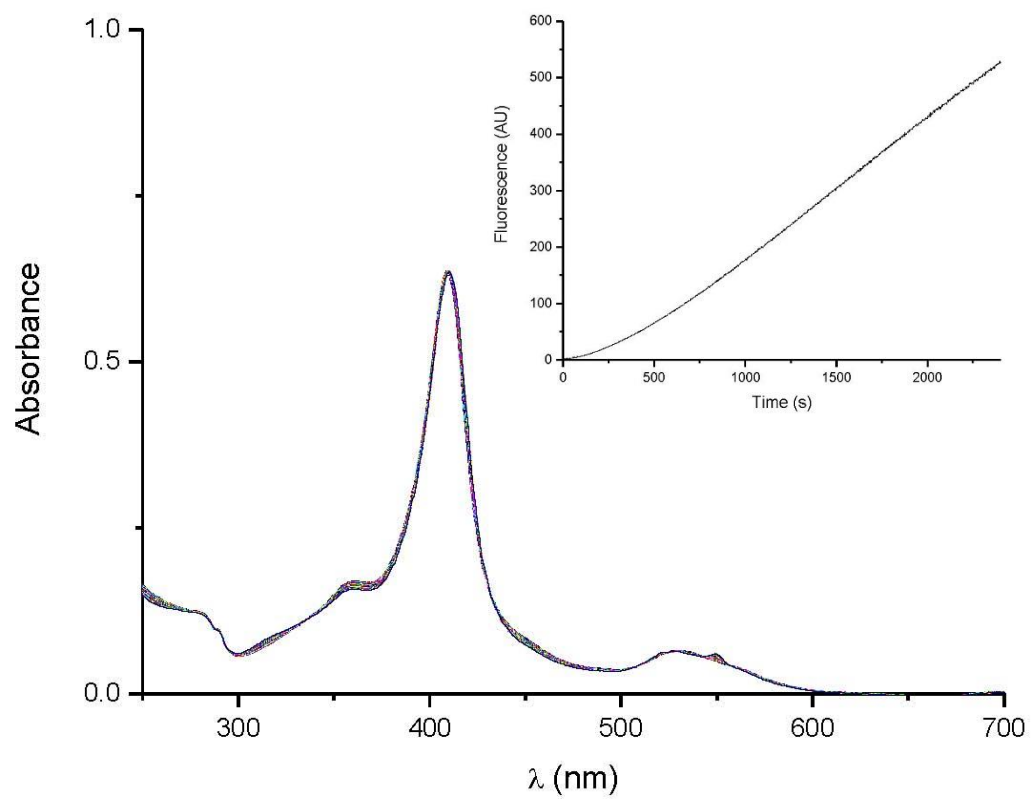

**Supplementary Material Table S1**

Supplementary Material 3 (Table S3) – Gaussian function parameters applied for the cyt c spectrum in the presence of SIN-1 and PCL, in 50 mM phosphate buffer, pH 7.4, for 10 and 20 min.

| System                       | Time (min) | A      | w      | y <sub>0</sub> | R <sup>2</sup> | (x <sub>c</sub> )λ <sub>max</sub> |
|------------------------------|------------|--------|--------|----------------|----------------|-----------------------------------|
| Cyt c 50 μM                  | 0          | 5.9201 | 14.515 | 0.2948         | 0.9884         | 408.37                            |
|                              | 10         | 5.5736 | 15.064 | 0.2647         | 0.9901         | 408.30                            |
|                              | 20         | 5.6315 | 14.853 | 0.2773         | 0.9906         | 408.48                            |
| Cyt c 5 μM +<br>SIN-1 50μM   | 0          | 4.1607 | 20.178 | 0.3382         | 0.9990         | 410.53                            |
|                              | 10         | 3.4547 | 18.200 | 0.3269         | 0.9989         | 409.53                            |
|                              | 20         | 3.5272 | 18.377 | 0.3271         | 0.9990         | 409.68                            |
| Cyt c 50 μM +<br>SIN-1 50μM  | 0          | 5.5823 | 14.948 | 0.2691         | 0.9903         | 408.34                            |
|                              | 10         | 4.8651 | 15.295 | 0.2134         | 0.9898         | 408.09                            |
|                              | 20         | 5.0023 | 15.542 | 0.2080         | 0.9898         | 407.95                            |
| Cyt c 50 μM +<br>SIN-1 100μM | 0          | 3.8930 | 14.634 | 0.2264         | 0.9912         | 408.56                            |
|                              | 10         | 4.6444 | 15.389 | 0.1993         | 0.9896         | 408.00                            |
|                              | 20         | 4.6383 | 15.335 | 0.0000         | 0.9894         | 408.05                            |

Where: A, area under curve; w, band width (data distribution); y<sub>0</sub>, curve cut off (baseline); R<sup>2</sup>, correlation index; x<sub>c</sub>, curve peak (calculated λ<sub>max</sub>).
